# Supplementary material for: The effect of community-based programs on diabetes prevention in low- and middle-income countries: a systematic review and meta-analysis
Source: Springer Nature journal article supplement (doi:10.1186/s12992-019-0451-4), 2019-02-01
Supplement: MOESM2 [file 16437744]

## Additional file 2: Characteristics of excluded studies

| No | Study                              | Reason for exclusion                                                                                                                                                                                            |
|----|------------------------------------|-----------------------------------------------------------------------------------------------------------------------------------------------------------------------------------------------------------------|
| 1  | Luo Y, 2017 [42]                   | Wrong intervention; combined pharmaceutical and lifestyle intervention                                                                                                                                          |
| 2  | D-CLIP (Weber M), 2012 [43]        | Wrong intervention; More than 50% of participants in the intervention arm had been administrated Metformin                                                                                                      |
| 3  | Chen MF, 2017 [44]                 | Improper intervention; Not community-based; Convenience sampling from a hospital in Taiwan                                                                                                                      |
| 4  | Lin A, 2014 [45]                   | Wrong intervention; combined pharmaceutical and lifestyle; intervention arm had been administrated diabetic medication                                                                                          |
| 5  | DIABRISK (Wijesuriya M), 2011 [46] | Improper intervention; same intervention applied to the intervention and control in the intensive vs. less-intensive way; entered population age 5 to 40 years old                                              |
| 6  | Liu H, 2016 [47]                   | Wrong population; entered pregnant women with GDM                                                                                                                                                               |
| 7  | DIABRISK (Guess N), 2016 [48]      | Improper intervention; same intervention applied to the intervention and control in the intensive vs. less-intensive way; entered population age 5 to 40 years old                                              |
| 8  | Nanditha A, 2016 [49]              | Pooled data of two studies: one study was not eligible (not community-based intervention that performed in 2006 and was not among our search result from 2008). the other study is one of our included studies. |
| 9  | Aira T, 2013 [50]                  | Improper intervention; wrong control program; Not community-based                                                                                                                                               |
| 10 | Cheng S, 2017 [49] [51]            | Improper population; Not community based study aimed to improve chronic liver disease among IGT patients with non-alcoholic fatty liver disease                                                                 |
| 11 | De Azevedo MBG, 2017 [52]          | Improper intervention; Not community-based                                                                                                                                                                      |
| 12 | Dunkley AJ, 2011 [53]              | Wrong outcome; only baseline data is presented                                                                                                                                                                  |
| 13 | Xu DF, 2013 [54]                   | Improper intervention; Not community-based                                                                                                                                                                      |
| 14 | Whittemore R, 2014 [55]            | Wrong outcome; did not report our study outcomes                                                                                                                                                                |
| 15 | Toobert DJ 2011 [56]               | Wrong setting; Latinas living in USA                                                                                                                                                                            |
| 16 | Stepenka V, 2010 [57]              | No outcome; only an abstract is available that did not present our study results.                                                                                                                               |
| 17 | Siqueira-Catania A, 2013 [58]      | Improper intervention; Not community-based                                                                                                                                                                      |
| 18 | Da Qing (Li G) 2014 [59]           | Improper intervention; Not community-based                                                                                                                                                                      |
| 19 | Da Qing (Li G) 2008 [60]           | Improper intervention; Not community-based                                                                                                                                                                      |
| 20 | Da Qing (Shen X), 2014 [61]        | Improper intervention; Not community-based                                                                                                                                                                      |
| 21 | Florez HJ, 2012 [62]               | Wrong outcome; an abstract that did not present our study results                                                                                                                                               |
| 22 | Jahangiry L, 2015 [63]             | Improper intervention; Not community-based                                                                                                                                                                      |
| 23 | Shek NWM, 2013 [64]                | Improper intervention; Not community-based                                                                                                                                                                      |
| 24 | Essien O, 2017 [65]                | Improper population; entered T2DM patients                                                                                                                                                                      |
| 25 | Lu Y-H, 2011 [66]                  | Wrong intervention; combined pharmaceutical and lifestyle intervention                                                                                                                                          |
| 26 | Pichayapinyo P, 2015 [67]          | Improper intervention; Not community-based                                                                                                                                                                      |
| 27 | DIABRISK (Wijesuriya M) 2017 [68]  | Improper intervention; same intervention applied in the intensive or less-intensive way; entered children and adolescents                                                                                       |
| 28 | Perichart-Perera O, 2014 [69]      | Improper intervention; Not community-based                                                                                                                                                                      |
| 29 | Wong KH, 2013 [70]                 | Wrong study setting; Hong Kong is classified HICs                                                                                                                                                               |
| 30 | Oba N, 2011 [71]                   | Inappropriate study design; No comparison group                                                                                                                                                                 |
